# Supplementary material for: Chlorate Specifically Targets Oxidant-Starved, Antibiotic-Tolerant Populations of Pseudomonas aeruginosa Biofilms
Source: PubMed Central journal article supplement (PMC6156191; doi:10.1128/mbio.01400-18), 2018-09-25

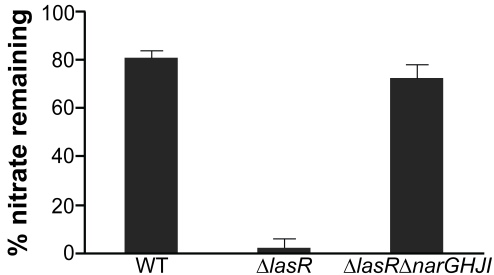

Supplement: mbo005184084sf4.pdf [file mbo005184084sf4.pdf]
